# Supplementary material for: Investigation on optical temperature sensing behaviour via Ag island-enhanced luminescence doped β-NaGdF4:Yb3+/Tm3+ films/microfibers
Source: Royal Society of Chemistry journal article supplement (doi:10.1039/d1ra06336g), 2021-01-01
Supplement: d1ra06336g1.pdf [file d1ra06336g1.pdf]

## Electronic Supplementary Informations

### Title: Investigation on optical temperature sensing behaviour via Ag island-enhanced luminescence doped $\beta$ -NaGdF<sub>4</sub>:Yb<sup>3+</sup>/Tm<sup>3+</sup> films/microfibers

Authors: Muhammad Khuram Shahzad<sup>a,b</sup>, Usman Farooq<sup>c</sup>, Adil Raza<sup>d</sup>, Ghulam Abbas<sup>e</sup>, Muhammad Ikram<sup>f</sup> and Yundong Zhang<sup>b</sup>

<sup>a</sup>Institute of Physics, Islamia University of Bahawalpur, Bahawalnagar campus, Pakistan

<sup>b</sup>National Key Laboratory of Tunable Laser Technology, Institute of Opto-Electronics, Department of Electronic Science and Technology, Harbin Institute of Technology (HIT), Harbin 150080, China

<sup>c</sup>School of Chemistry and Chemical Engineering, Henan University, Kaifeng, China

<sup>d</sup>Jiangsu Key Laboratory of Materials and Technology for Energy Conversion, College of Materials Science and Technology, Nanjing University of Aeronautics and Astronautics, Jiangjun Rd. Campus, 29 Jiangjun Ave., Nanjing 210016, P. R. China.

<sup>e</sup>Department of Physics, Riphah International University, Faisalabad Campus, Pakistan

<sup>f</sup>Solar Cell Applications Research Lab, Department of Physics, Government College University, 54000, Punjab, Pakistan

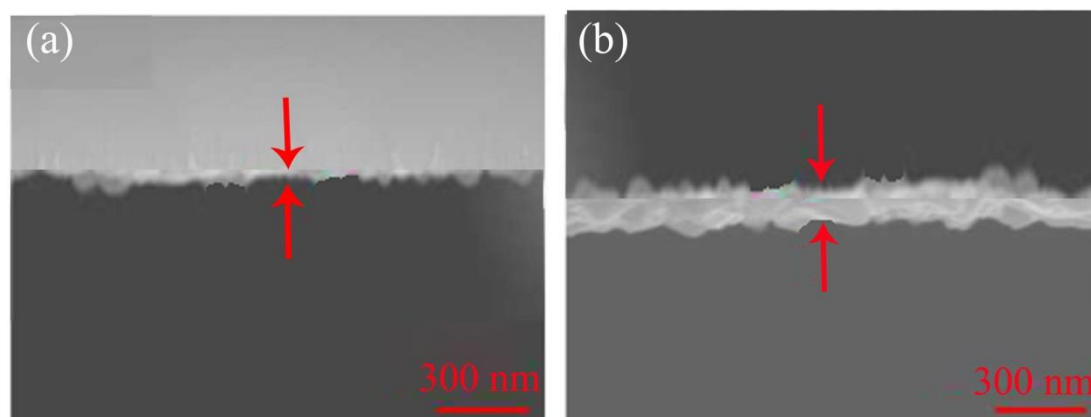

Fig. S1 Characterization of thin film. (a) SEM image of NaGdF<sub>4</sub>:Yb<sup>3+</sup>/Tm<sup>3+</sup>. (b) SEM images of Ag doped NaGdF<sub>4</sub>:Yb<sup>3+</sup>/Tm<sup>3+</sup>

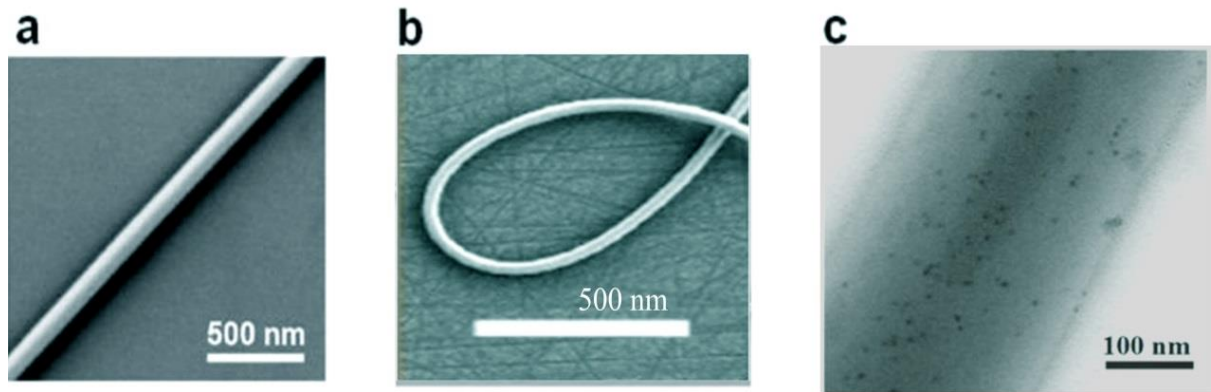

**Fig. S2** Characterization of microfibers. (a) SEM image of microfiber having diameter of 12 μm. (b) SEM images of microfiber with diameter of 11 μm. (c) TEM images of microfiber with diameter of 8 μm.
